# Supplementary material
Source: PubMed Central journal article supplement (PMC6755042)
Supplement: NIHMS1534480-supplement-1.pdf [file NIHMS1534480-supplement-1.pdf]

**Supplemental Figure 1.** Flow diagram of study participants

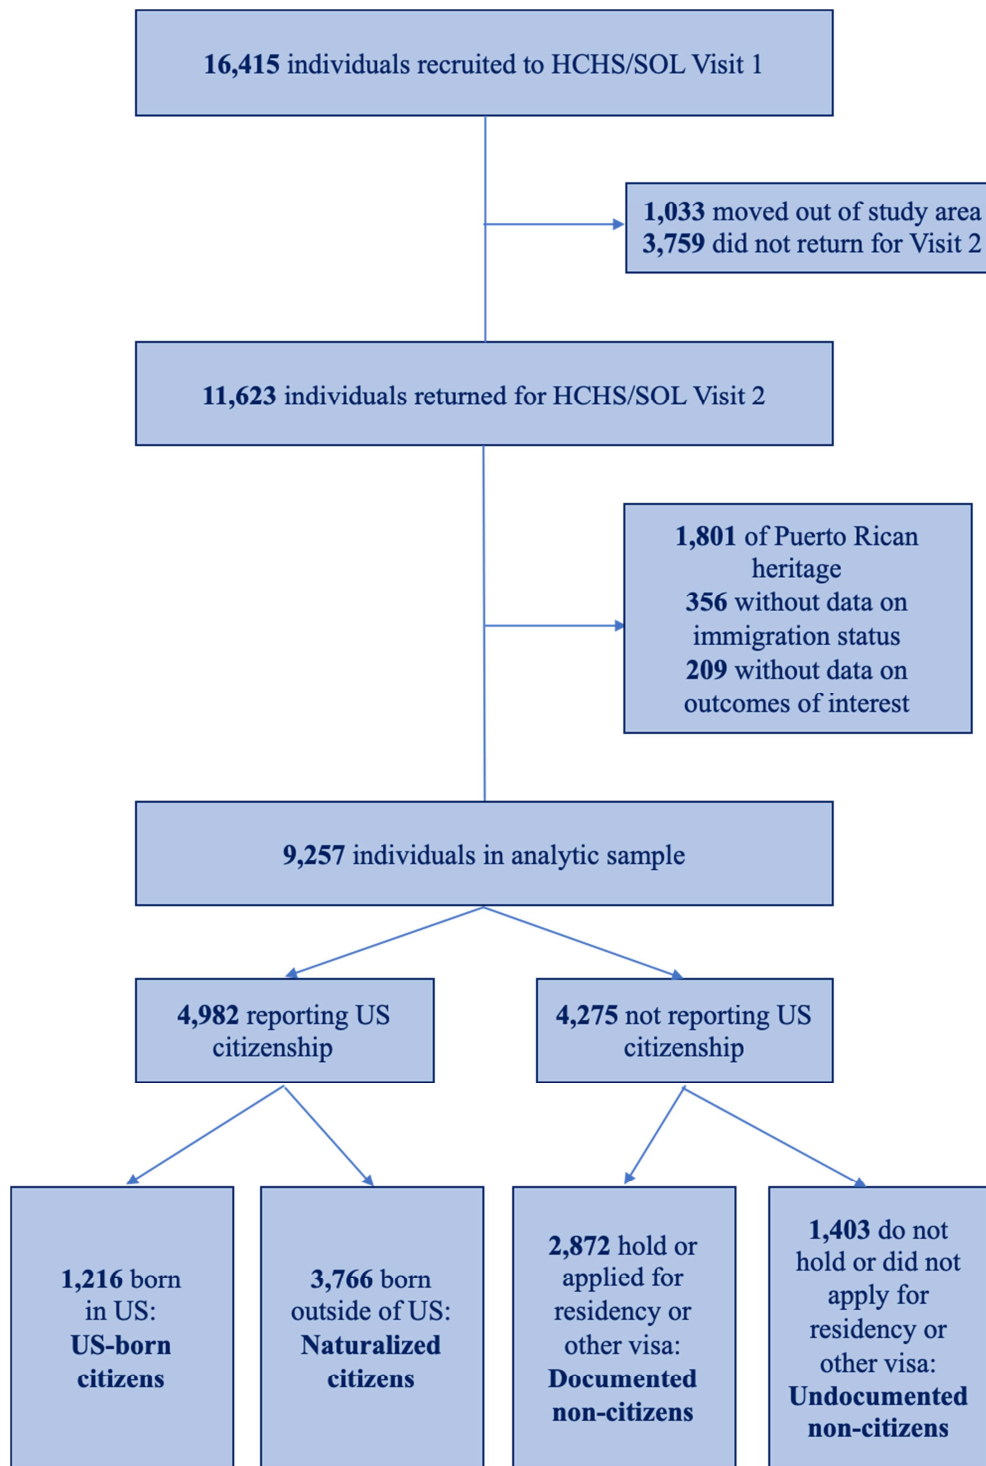

**SUPPLEMENTAL TABLE 1. Modeled prevalence of anxiety and use of anxiolytic medication among Hispanics/Latinos attending HCHS/SOL Visit 2<sup>a</sup> – sensitivity analysis including health insurance as a covariate**

|                                                                                       | Documented non-citizens | Undocumented non-citizens     | Naturalized citizens          | US-born citizens              |
|---------------------------------------------------------------------------------------|-------------------------|-------------------------------|-------------------------------|-------------------------------|
| <b>Anxiety<sup>b</sup> among participants &lt;45 years (N=2199)</b>                   |                         |                               |                               |                               |
| Unadjusted model, PR (95% CI)                                                         | Ref                     | 0.75 (0.48-1.15) <sup>c</sup> | 1.04 (0.68-1.61) <sup>c</sup> | 1.85 (1.26-2.70) <sup>d</sup> |
| Multivariable model <sup>‡</sup> , aPR (95% CI)                                       | Ref                     | 0.77 (0.48-1.23) <sup>c</sup> | 0.96 (0.62-1.48) <sup>c</sup> | 1.78 (1.24-2.55) <sup>f</sup> |
| <b>Anxiety<sup>b</sup> among participants ≥45 years (N=6859)</b>                      |                         |                               |                               |                               |
| Unadjusted model, PR (95% CI)                                                         | Ref                     | 0.62 (0.45-0.84) <sup>d</sup> | 1.06 (0.89-1.27) <sup>c</sup> | 0.89 (0.67-1.18) <sup>c</sup> |
| Multivariable model <sup>f</sup> , aPR (95% CI)                                       | Ref                     | 0.88 (0.62-1.25) <sup>c</sup> | 0.96 (0.81-1.15) <sup>c</sup> | 0.93 (0.71-1.22) <sup>c</sup> |
| <b>Use medication for anxiety among participants with anxiety (all ages) (N=1487)</b> |                         |                               |                               |                               |
| Unadjusted model, PR (95% CI)                                                         | Ref                     | 0.42 (0.25-0.70) <sup>d</sup> | 1.35 (1.10-1.66) <sup>d</sup> | 0.90 (0.67-1.21) <sup>c</sup> |
| Multivariable model <sup>g</sup> , aPR (95% CI)                                       | Ref                     | 0.72 (0.41-1.26) <sup>c</sup> | 1.13 (0.94-1.36) <sup>c</sup> | 1.09 (0.78-1.53) <sup>c</sup> |

HCHS/SOL = Hispanic Community Health Study / Study of Latinos; PR = prevalence ratio; CI = confidence interval; GAD-7 = Generalized anxiety disorder 7-item scale<sup>13</sup>

<sup>a</sup> Estimates weighted and standard errors adjusted to account for probability sampling design of HCHS/SOL

<sup>b</sup> defined as GAD-7 score ≥10 or self-reported use of medication for anxiety

<sup>c</sup> p NS

<sup>d</sup> p<0.05

<sup>e</sup> p<0.01

<sup>f</sup> p<0.001

<sup>g</sup> adjusted for Hispanic background, field center, sex, education, employment status, health insurance, Charlson comorbidity index<sup>25</sup>

<sup>h</sup> adjusted for Hispanic background, field center, age, sex, education, employment status, health insurance, Charlson comorbidity index<sup>25</sup>

**SUPPLEMENTAL TABLE 2. Modeled prevalence of depression and use of antidepressant medication among Hispanics/ Latinos attending HCHS/SOL Visit 2<sup>a</sup> – sensitivity analysis including health insurance as a covariate**

|                                                                                  | Documented non-citizens | Undocumented non-citizens     | Naturalized citizens          | US-born citizens              |
|----------------------------------------------------------------------------------|-------------------------|-------------------------------|-------------------------------|-------------------------------|
| <b>Depression<sup>b</sup> (N=9058)</b>                                           |                         |                               |                               |                               |
| Unadjusted model, PR (95% CI)                                                    | Ref                     | 0.84 (0.70-1.01) <sup>d</sup> | 1.06 (0.92-1.21) <sup>d</sup> | 1.05 (0.87-1.28) <sup>d</sup> |
| Multivariable model <sup>c</sup> , aPR (95% CI)                                  | Ref                     | 0.98 (0.79-1.21) <sup>d</sup> | 0.95 (0.83-1.10) <sup>d</sup> | 1.41 (1.14-1.74) <sup>f</sup> |
| <b>Use medication for depression among participants with depression (N=2313)</b> |                         |                               |                               |                               |
| Bivariate model, PR (95% CI)                                                     | Ref                     | 0.28 (0.16-0.48) <sup>g</sup> | 1.36 (1.09-1.70) <sup>e</sup> | 0.87 (0.69-1.27) <sup>d</sup> |
| Multivariable model <sup>c</sup> , aPR (95% CI)                                  | Ref                     | 0.56 (0.30-1.05) <sup>d</sup> | 1.13 (0.93-1.38) <sup>d</sup> | 0.97 (0.67-1.40) <sup>d</sup> |

HCHS/SOL = Hispanic Community Health Study / Study of Latinos; PR = prevalence ratio; CI = confidence interval; CES-D10 = Center for Epidemiologic Studies Depression 10-item scale<sup>15</sup>

<sup>a</sup> Estimates weighted and standard errors adjusted to account for probability sampling design of HCHS/SOL

<sup>b</sup> defined as CES-D10 score  $\geq 10$  or self-reported use of medication for depression

<sup>c</sup> adjusted for Hispanic background, field center, sex, education, employment status, health insurance, Charlson comorbidity index<sup>25</sup>

<sup>d</sup> p NS

<sup>e</sup> p <0.01

<sup>f</sup> p <0.0001

<sup>g</sup> p <0.05

**SUPPLEMENTAL TABLE 3. Modeled prevalence of anxiety and use of anxiolytic medication among Hispanics/Latinos attending HCHS/SOL Visit 2<sup>a</sup> – sensitivity analysis using definition of anxiety defined as GAD-7 score  $\geq 10$  (does not include self-reported use of medication for anxiety)**

|                                                                                       | Documented non-citizens | Undocumented non-citizens     | Naturalized citizens          | US-born citizens              |
|---------------------------------------------------------------------------------------|-------------------------|-------------------------------|-------------------------------|-------------------------------|
| <b>Anxiety<sup>b</sup> among participants &lt;45 years (N=2199)</b>                   |                         |                               |                               |                               |
| Unadjusted model, PR (95% CI)                                                         | Ref                     | 0.75 (0.49-1.17) <sup>c</sup> | 0.96 (0.60-1.54) <sup>c</sup> | 1.68 (1.12-2.52) <sup>d</sup> |
| Multivariable model <sup>‡</sup> , aPR (95% CI)                                       | Ref                     | 0.66 (0.42-1.02) <sup>c</sup> | 0.93 (0.58-1.49) <sup>c</sup> | 1.68 (1.14-2.48) <sup>f</sup> |
| <b>Anxiety<sup>b</sup> among participants <math>\geq 45</math> years (N=6859)</b>     |                         |                               |                               |                               |
| Unadjusted model, PR (95% CI)                                                         | Ref                     | 0.78 (0.56-1.08) <sup>c</sup> | 0.84 (0.67-1.04) <sup>c</sup> | 0.68 (0.48-0.96) <sup>d</sup> |
| Multivariable model <sup>f</sup> , aPR (95% CI)                                       | Ref                     | 0.83 (0.59-1.19) <sup>c</sup> | 0.84 (0.68-1.04) <sup>c</sup> | 0.75 (0.53-1.06) <sup>c</sup> |
| <b>Use medication for anxiety among participants with anxiety (all ages) (N=1487)</b> |                         |                               |                               |                               |
| Unadjusted model, PR (95% CI)                                                         | Ref                     | 0.33 (0.15-0.72) <sup>e</sup> | 1.20 (0.84-1.72) <sup>c</sup> | 0.70 (0.37-1.31) <sup>c</sup> |
| Multivariable model <sup>§</sup> , aPR (95% CI)                                       | Ref                     | 0.56 (0.21-1.48) <sup>c</sup> | 0.99 (0.72-1.36) <sup>c</sup> | 0.72 (0.38-1.34) <sup>c</sup> |

HCHS/SOL = Hispanic Community Health Study / Study of Latinos; PR = prevalence ratio; CI = confidence interval; GAD-7 = Generalized anxiety disorder 7-item scale<sup>13</sup>

<sup>a</sup> Estimates weighted and standard errors adjusted to account for probability sampling design of HCHS/SOL

<sup>b</sup> defined as GAD-7 score  $\geq 10$

<sup>c</sup> p NS

<sup>d</sup> p<0.05

<sup>e</sup> p<0.01

<sup>f</sup> p<0.001

<sup>§</sup> adjusted for Hispanic background, field center, sex, education, employment status, Charlson comorbidity index<sup>25</sup>

<sup>h</sup> adjusted for Hispanic background, field center, age, sex, education, employment status, Charlson comorbidity index<sup>25</sup>

**SUPPLEMENTAL TABLE 4. Modeled prevalence of depression and use of antidepressant medication among Hispanics/ Latinos attending HCHS/SOL Visit 2<sup>a</sup> – sensitivity analysis using definition of depression defined as CES-D10 score  $\geq 10$  (does not include self-reported use of medication for depression)**

|                                                                                  | Documented<br>non-citizens | Undocumented<br>non-citizens  | Naturalized<br>citizens       | US-born<br>citizens           |
|----------------------------------------------------------------------------------|----------------------------|-------------------------------|-------------------------------|-------------------------------|
| <b>Depression<sup>b</sup> (N=9058)</b>                                           |                            |                               |                               |                               |
| Unadjusted model, PR (95% CI)                                                    | Ref                        | 0.90 (0.74-1.08) <sup>d</sup> | 0.97 (0.84-1.13) <sup>d</sup> | 1.01 (0.82-1.24) <sup>d</sup> |
| Multivariable model <sup>c</sup> , aPR (95% CI)                                  | Ref                        | 0.93 (0.76-1.13) <sup>d</sup> | 0.91 (0.78-1.06) <sup>d</sup> | 1.38 (1.09-1.73) <sup>e</sup> |
| <b>Use medication for depression among participants with depression (N=2313)</b> |                            |                               |                               |                               |
| Bivariate model, PR (95% CI)                                                     | Ref                        | 0.21 (0.12-0.39) <sup>f</sup> | 1.24 (0.93-1.67) <sup>d</sup> | 0.59 (0.35-0.99) <sup>g</sup> |
| Multivariable model <sup>c</sup> , aPR (95% CI)                                  | Ref                        | 0.39 (0.20-0.76) <sup>e</sup> | 1.10 (0.84-1.45) <sup>d</sup> | 0.72 (0.44-1.19) <sup>d</sup> |

HCHS/SOL = Hispanic Community Health Study / Study of Latinos; PR = prevalence ratio; CI = confidence interval; CES-D10 = Center for Epidemiologic Studies Depression 10-item scale<sup>15</sup>

<sup>a</sup> Estimates weighted and standard errors adjusted to account for probability sampling design of HCHS/SOL

<sup>b</sup> defined as CES-D10 score  $\geq 10$

<sup>c</sup> adjusted for Hispanic background, field center, sex, education, employment status, Charlson comorbidity index<sup>25</sup>

<sup>d</sup> p NS

<sup>e</sup> p <0.01

<sup>f</sup> p <0.0001

<sup>g</sup> p <0.05
